# Supplementary material for: Dual Contrast - Magnetic Resonance Fingerprinting (DC-MRF): A Platform for Simultaneous Quantification of Multiple MRI Contrast Agents
Source: PubMed Central journal article supplement (PMC5559598; doi:10.1038/s41598-017-08762-9), 2017-08-16
Supplement: 41598_2017_8762_MOESM1_ESM.pdf [file 41598_2017_8762_MOESM1_ESM.pdf]

# Dual Contrast - Magnetic Resonance Fingerprinting (DC-MRF): A Platform for Simultaneous Quantification of Multiple MRI Contrast Agents

Christian E. Anderson<sup>1,2</sup>, Shannon B. Donnola<sup>1</sup>, Yun Jiang<sup>1</sup>, Joshua Batesole<sup>1</sup>, Rebecca Darrah<sup>3,4</sup>, Mitchell L. Drumm<sup>4,5</sup>, Susann M. Brady-Kalnay<sup>6,7</sup>, Nicole F. Steinmetz<sup>1,2,8,9,10</sup>, Xin Yu<sup>2,11</sup>, Mark A. Griswold<sup>1,2</sup>, Chris A. Flask<sup>1,2,5\*</sup>

<sup>1</sup>Department of Radiology, Case Western Reserve University, Cleveland, OH.

<sup>2</sup>Department of Biomedical Engineering, Case Western Reserve University, Cleveland, OH.

<sup>3</sup>Frances Payne Bolton School of Nursing, Case Western Reserve University, Cleveland, OH.

<sup>4</sup>Department of Genetics and Genome Sciences, Case Western Reserve University, Cleveland, OH.

<sup>5</sup>Department of Pediatrics, Case Western Reserve University, Cleveland, OH.

<sup>6</sup>Department of Molecular Biology and Microbiology, Case Western Reserve University, Cleveland, OH.

<sup>7</sup>Department of Neurosciences, Case Western Reserve University, Cleveland, OH.

<sup>8</sup>Department of Materials Science and Engineering, Case Western Reserve University, Cleveland, OH.

<sup>9</sup>Department of Macromolecular Science and Engineering, Case Western Reserve University, Cleveland, OH.

<sup>10</sup>Division of General Medicine-Oncology, Case Western Reserve University, Cleveland, OH.

<sup>11</sup>Department of Physiology and Biophysics, Case Western Reserve University, Cleveland, OH.

\*Corresponding Author

This file contains supplementary figures for *Dual Contrast – Magnetic Resonance Fingerprinting: A Platform for Simultaneous Quantification of Multiple MRI Contrast Agents*. Each figure is on its own page.

**Supplementary Table S1.** In Vitro Phantom Concentrations. 5 Gadolinium-Only Phantoms (#1-5), 5 Manganese-Only Phantoms (#6-10), 6 Phantoms with Both Contrast Agent (#11-16), and one Solvent-Only Phantom (#17, deionized water).

| <b>Phantom</b> | <b>Gadolinium Concentration (mM)</b> | <b>Manganese Concentration (mM)</b> |
|----------------|--------------------------------------|-------------------------------------|
| <b>1</b>       | <b>0.5</b>                           | <b>0</b>                            |
| <b>2</b>       | <b>0.3</b>                           | <b>0</b>                            |
| <b>3</b>       | <b>0.2</b>                           | <b>0</b>                            |
| <b>4</b>       | <b>0.1</b>                           | <b>0</b>                            |
| <b>5</b>       | <b>0.05</b>                          | <b>0</b>                            |
| <b>6</b>       | <b>0</b>                             | <b>0.2</b>                          |
| <b>7</b>       | <b>0</b>                             | <b>0.1</b>                          |
| <b>8</b>       | <b>0</b>                             | <b>0.05</b>                         |
| <b>9</b>       | <b>0</b>                             | <b>0.025</b>                        |
| <b>10</b>      | <b>0</b>                             | <b>0.0125</b>                       |
| <b>11</b>      | <b>0.03125</b>                       | <b>0.15</b>                         |
| <b>12</b>      | <b>0.0625</b>                        | <b>0.1</b>                          |
| <b>13</b>      | <b>0.125</b>                         | <b>0.05</b>                         |
| <b>14</b>      | <b>0.25</b>                          | <b>0.025</b>                        |
| <b>15</b>      | <b>0.355</b>                         | <b>0.0125</b>                       |
| <b>16</b>      | <b>0.025</b>                         | <b>0.00625</b>                      |
| <b>17</b>      | <b>0</b>                             | <b>0</b>                            |

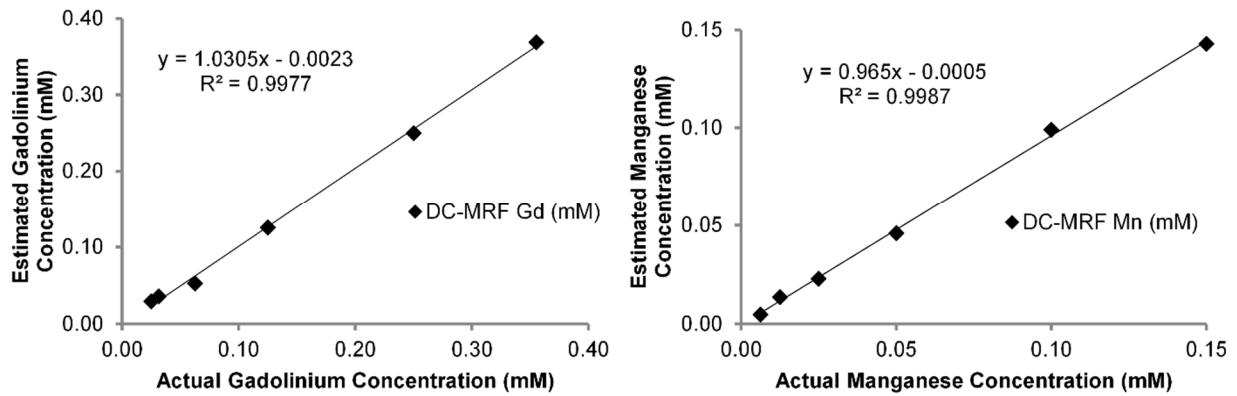

**Supplementary Figure S1.** Pearson correlation plots of mean DC-MRF estimates for Gd (left) and Mn (right) concentrations against known concentrations at 60 MHz from phantoms containing mixtures of both MRI contrast agents (Supplementary Table S1 Phantoms 11-16; n=6). Concentrations were estimated from the 60 MHz measurements of T1 and T2 and using equations (3a) and (3b). These data are a subset of the data shown in Figure 2.

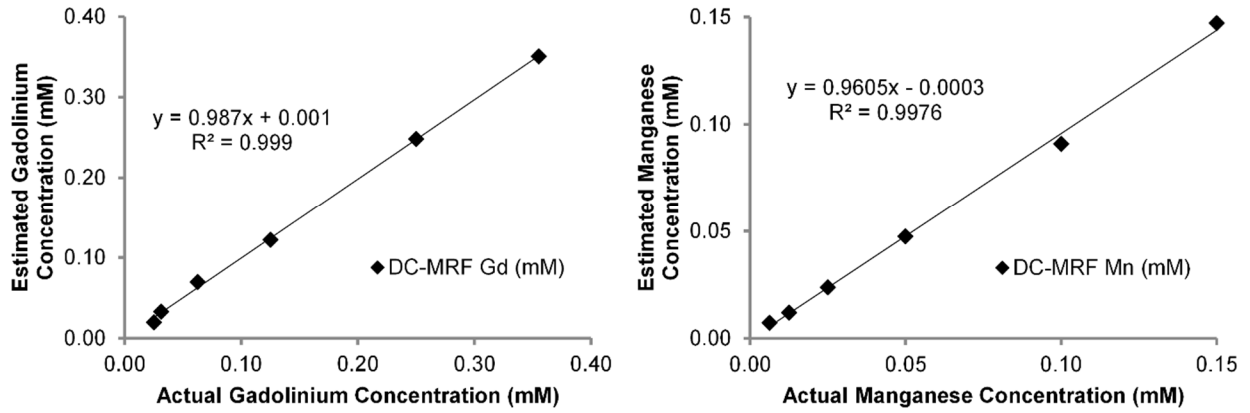

**Supplementary Figure S2.** Pearson correlation plots of mean DC-MRF estimates for Gd (left) and Mn (right) concentrations against known concentrations at 3T from phantoms containing mixtures of both contrast agents (Supplementary Table S1 Phantoms 11-16; n=6). Concentrations were estimated using equations (3a) and (3b) and mean T1 and T2 values obtained from MRF-based maps. These data are a subset of the data shown in Figure 5.

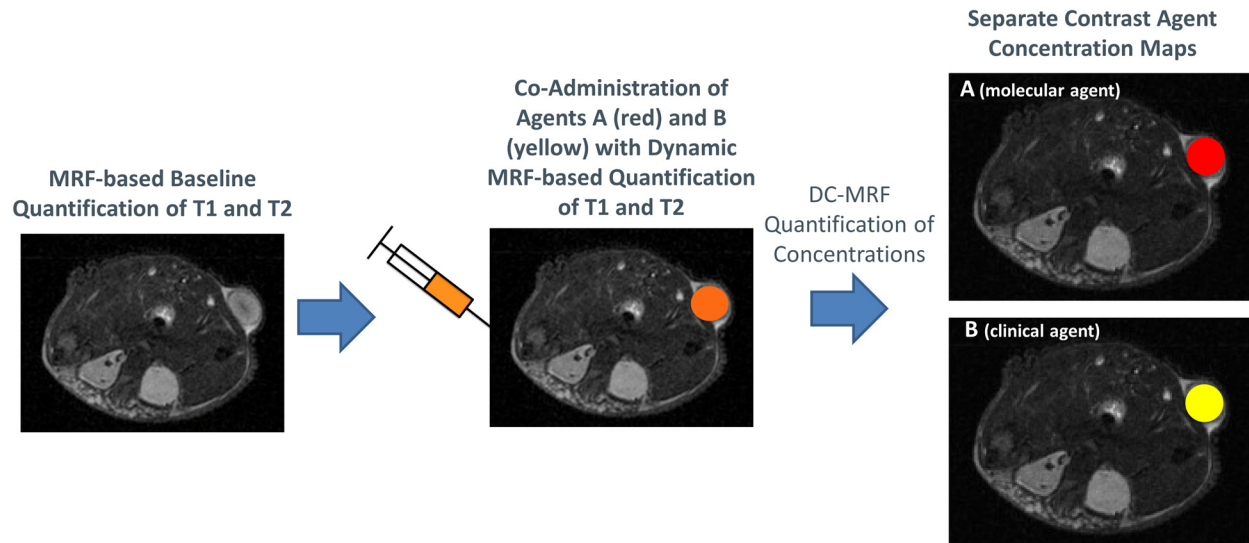

**Supplementary Figure S3.** Proposed workflow for in vivo DC-MRF application. This workflow describes how two agents (Agent A, red; Agent B, yellow) could be applied and quantified in vivo. A baseline MRF scan is first performed to provide pre-contrast T1 and T2 relaxation time maps ( $T1_0$  and  $T2_0$ ). After the baseline scans, a solution containing a mixture of two contrast agents is injected (pseudo-color orange in syringe and tumor) while MRF-based T1 and T2 maps are dynamically collected. These T1 and T2 maps can be used in the DC-MRF framework to yield pixel-wise calculations of ion concentration resulting in maps of each individual agent using Equations (3a) and (3b). This process assumes that the in vivo relaxivities ( $r_1, r_2$ ) of the two MRI contrast agents have already been determined.
